# Supplementary material for: Incidence and Clinical Features of Immune-Related Acute Kidney Injury in Patients Receiving Programmed Cell Death Ligand-1 Inhibitors
Source: PubMed Central journal article supplement — Kidney Int Rep. 2020 Jul 21;5(10):1700–5. doi: 10.1016/j.ekir.2020.07.011 (PMC7569697; doi:10.1016/j.ekir.2020.07.011), 2020-07-21
Supplement: mmc1.pdf [file mmc1.pdf]

**Supplemental Table 1: De-identified case summaries of patients with sustained AKI.**

| ID | Etiology            | Case summary                                                                                                                                                                                                                                                                                                                                                                                | Concurrent AIN associated medications | Concurrent irAE | Steroids | Outcome          |
|----|---------------------|---------------------------------------------------------------------------------------------------------------------------------------------------------------------------------------------------------------------------------------------------------------------------------------------------------------------------------------------------------------------------------------------|---------------------------------------|-----------------|----------|------------------|
| 1  | ICPI-NOS            | 65 yo WF with SCLC whose creatinine rose from 0.83 to 1.65mg/dL (stage 1 AKI) two months after starting atezolizumab that occurred in the context of new diagnosis of colitis, hyperthyroidism, and AKI; patient transitioned to hospice without full workup.                                                                                                                               | PPI                                   | hypothyroidism  | No       | Terminal decline |
| 2  | ICPI-NOS            | 65 yo WF with RCC whose creatinine rose from 1.14 to 2.88mg/dL (stage 2 AKI) six months after starting atezolizumab, patient's creatinine did not improve despite volume repletion, then developed colitis and received corticosteroids with improvement in AKI. Not rechallenged with ICI.                                                                                                 | PPI, NSAIDS, Amoxicillin              | Colitis         | Yes      | Partial recovery |
| 3  | ICPI-AIN            | 50 yo WM with bladder cancer whose creatinine rose from 1.41 to 2.19mg/dL (stage 1 AKI) eight months after starting atezolizumab due to biopsy-proven AIN. Creatinine remained persistently elevated in the 1.9-2.2mg/dL range despite prednisone 60mg daily. Not rechallenged further with ICI                                                                                             | Ciprofloxacin                         | 0               | Yes      | No recovery      |
| 4  | ICPI-NOS            | 65 yo WM with bladder cancer whose creatinine rose from 1.14 to 6.61mg/dL (stage 3 AKI) four months after starting atezolizumab due to clinically diagnosed AIN that fully recovered with prednisone 60mg daily tapered by 10mg/week. Not rechallenged with ICI.                                                                                                                            | Levofloxacin                          | 0               | Yes      | Full recovery    |
| 5  | ICPI-NOS            | 55 yo WF with NSCLC whose creatinine rose from 0.69 to 1.21mg/dL (stage 1 AKI) four months after starting durvalumab which occurred concurrently with immune-mediated cytopenias and resolved with discontinuation of durvalumab. Eleven months later, patient was re-challenged with nivolumab and despite continuing to take NSAIDs as needed, the patient did not develop recurrent AKI. | NSAIDS                                | Cytopenias      | No       | Full recovery    |
| 6  | Hemodynamic AKI/ATN | 70 yo WF with bladder cancer whose creatinine rose from 1.75 to 2.78mg/dL (stage 1 AKI) seven months after starting avelumab due to prerenal azotemia from volume depletion and hypercalcemia, improved with supportive care.                                                                                                                                                               | NSAIDS                                | 0               | No       | Partial recovery |
| 7  | Hemodynamic AKI/ATN | 55 yo WF with ovarian cancer whose creatinine rose from 0.84 to 2.83 mg/dL (stage 3 AKI) 2 weeks after starting avelumab due to poor oral intake, improved with volume repletion.                                                                                                                                                                                                           | PPI                                   | 0               | No       | Partial recovery |
| 8  | Hemodynamic AKI/ATN | 75 yo WF with ovarian cancer whose creatinine rose from 1.01 to 4.82mg/dL (stage 3 AKI) four months after starting avelumab due to febrile neutropenia and septic shock leading to death.                                                                                                                                                                                                   | NSAIDS                                | hyperthyroidism | No       | Terminal decline |
| 9  | Hemodynamic AKI/ATN | 75 yo WF with ovarian cancer whose creatinine rose from 0.79 to 2.49mg/dL (stage 3 AKI) two weeks after starting avelumab due to bowel obstruction from widely metastatic cancer leading to intraabdominal sepsis, shock, and death.                                                                                                                                                        | None                                  | 0               | No       | Terminal decline |
| 10 | Hemodynamic AKI/ATN | 65 yo WM with smoldering multiple myeloma whose creatinine rose from 1.08 to 2.00mg/dL (stage 1 AKI) four months after starting durvalumab, attributed to conversion to active myeloma (kappa light chain predominant), creatinine improved with volume repletion and beginning lenalidomide, bortezomib, and dexamethasone induction.                                                      | None                                  | hypothyroidism  | No       | Partial recovery |
| 11 | Hemodynamic AKI/ATN | 45 yo WM with NSCLC whose creatinine rose from 0.93 to 2.51mg/dL (stage 2 AKI) one month after starting atezolizumab due to contrast exposure and shock, ultimately died of respiratory failure from pulmonary embolus and rapid cancer progression.                                                                                                                                        | Levofloxacin                          | 0               | No       | Terminal decline |
| 12 | Hemodynamic AKI/ATN | 60 yo WF with NSCLC whose creatinine rose from 0.82 to 3.02mg/dL (stage 3 AKI) five months after starting atezolizumab due to intraabdominal shock (chronic                                                                                                                                                                                                                                 | PPI, NSAIDS, Antibiotics              | 0               | No       | Terminal decline |

|    |                     |                                                                                                                                                                                                                                                                                                                                  |                            |                |    |                  |
|----|---------------------|----------------------------------------------------------------------------------------------------------------------------------------------------------------------------------------------------------------------------------------------------------------------------------------------------------------------------------|----------------------------|----------------|----|------------------|
|    |                     | diverticulitis/pericolonic abscess with bowel perforation), cardiopulmonary arrest, ultimately leading to death.                                                                                                                                                                                                                 |                            |                |    |                  |
| 13 | Hemodynamic AKI/ATN | 75 yo WM with NSCLC whose creatinine rose from 0.90 to 1.68mg/dL (stage 1 AKI) one week after starting atezolizumab due to cholecystitis (symptoms/imaging signs predated ICI initiation) requiring percutaneous drainage and broad-spectrum antibiotics. Resolved with supportive care. Rechallenged with no recurrence of AKI. | PPI                        | 0              | No | Full recovery    |
| 14 | Hemodynamic AKI/ATN | 65 yo WF with NSCLC whose creatinine rose from 0.88 to 1.55mg/dL (stage 1 AKI) two months after starting durvalumab due to sepsis from pneumonia and volume depletion, improved with supportive care and antibiotics.                                                                                                            | NSAIDS                     | 0              | No | Partial recovery |
| 15 | Hemodynamic AKI/ATN | 55 yo WF with breast cancer whose creatinine rose from 0.93 to 1.60 (stage 1 AKI) seven months after starting atezolizumab due to volume depletion that resolved with volume repletion. Rechallenged with no recurrence of AKI.                                                                                                  | None                       | hypothyroidism | No | Full recovery    |
| 16 | Hemodynamic AKI/ATN | 70 yo WF with breast cancer whose creatinine rose from 1.04 to 2.01 eight months after starting avelumab due to poor PO intake, improved with volume repletion, no concurrent irAE.                                                                                                                                              | PPI                        | 0              | No | Partial Recovery |
| 17 | Hemodynamic AKI/ATN | 55 yo BF with rectal cancer whose creatinine rose from 0.59 to 1.85mg/dL (stage 3 AKI) four months after starting atezolizumab due to sepsis from bacteremia, ultimately leading to death.                                                                                                                                       | PPI, NSAIDS, Ciprofloxacin | 0              | No | Terminal decline |
| 18 | Hemodynamic AKI/ATN | 70 yo WM with melanoma whose creatinine rose from 0.72 to 1.27mg/dL (stage 1 AKI) nine month after starting atezolizumab due to volume depletion and anemia, recovered after a blood transfusion. Rechallenged with no recurrence of AKI.                                                                                        | None                       | rash           | No | Full recovery    |
| 19 | Hemodynamic AKI/ATN | 75 yo AM with bladder cancer whose creatinine rose from 1.76 to 4.85mg/dL (stage 2 AKI) six months after starting atezolizumab due to blood culture-positive urosepsis, resolved with antibiotics and supportive care.                                                                                                           | None                       | 0              | No | Full recovery    |
| 20 | Hemodynamic AKI/ATN | 70 yo WM with RCC whose creatinine rose from 1.84 to 2.93mg/dL (stage 1 AKI) 6 weeks after starting atezolizumab and bevacizumab, attributed to bevacizumab given new proteinuria (5.3 g/24 hours), improved with holding both agents.                                                                                           | PPI                        | 0              | No | Partial recovery |
| 21 | Hemodynamic AKI/ATN | 60 yo WF with ovarian cancer whose creatinine rose from 0.96 to 2.05mg/dL (stage 2 AKI) four months after starting avelumab due to volume depletion, which improved with volume repletion and blood transfusion.                                                                                                                 | NSAIDS                     | 0              | No | Partial recovery |
| 22 | Hemodynamic AKI/ATN | 80 yo WM with SCLC cancer whose creatinine rose from 1.25 to 4.02mg/dL (stage 3 AKI) eight months after starting atezolizumab due to septic shock from aspiration pneumonia leading to death.                                                                                                                                    | PPI                        | 0              | No | Terminal decline |
| 23 | Hemodynamic AKI/ATN | 80 yo M with NSCLC cancer whose creatinine rose from 1.31 to 2.18mg/dL (stage 1 AKI) four months after starting atezolizumab due to poor oral intake that improved with intravenous volume repletion.                                                                                                                            | PPI                        | 0              | No | Partial recovery |
| 24 | Hemodynamic AKI/ATN | 65 yo WF with NSCLC whose creatinine rose from 0.81 to 2.16mg/dL (stage 2 AKI) six months after starting atezolizumab due to excessive alcohol intake and lisinopril use, fully resolved with holding lisinopril and oral volume repletion. ICI was stopped, patient was not rechallenged.                                       | PPI                        | 0              | No | Full recovery    |
| 25 | Hemodynamic AKI/ATN | 55 yo WM with NSCLC whose creatinine rose from 0.86 to 1.54mg/dL (stage 1 AKI) eleven months after starting atezolizumab due to poor oral intake and NSAID use, resolved with volume repletion. Rechallenged with no recurrence of AKI.                                                                                          | PPI, NSAIDS                | hypothyroidism | No | Full recovery    |
| 26 | Hemodynamic AKI/ATN | 50 yo WF with colorectal cancer whose creatinine rose from 0.46 to 1.72mg/dL (stage 3 AKI) in the context of sepsis/bacteremia 4.5 months after starting atezolizumab, recovered with supportive care. Rechallenged with no recurrence of AKI.                                                                                   | None                       | 0              | No | Full recover     |

|    |                     |                                                                                                                                                                                                                                                                                                                                             |                    |                |    |                  |
|----|---------------------|---------------------------------------------------------------------------------------------------------------------------------------------------------------------------------------------------------------------------------------------------------------------------------------------------------------------------------------------|--------------------|----------------|----|------------------|
| 27 | Hemodynamic AKI/ATN | 80 yo WM with bladder cancer whose creatinine rose from 1.64 to 3.19 (stage 1 AKI) ten months after beginning atezolizumab due to septic shock from small bowel obstruction and decompensated congestive heart failure leading to death.                                                                                                    | None               | 0              | No | Terminal decline |
| 28 | Hemodynamic AKI/ATN | 75 yo WM with bladder cancer whose creatinine rose from 1.31 to 2.22mg/dL (stage 1 AKI) seven months after starting atezolizumab due to prerenal azotemia from poor oral intake and placed on hospice.                                                                                                                                      | None               | hypothyroidism | No | No recovery      |
| 29 | Obstruction         | 80 yo WM with bladder cancer whose creatinine rose from 1.24 to 2.55mg/dL (stage 2 AKI) two weeks after starting atezolizumab due to cancerous obstruction of renal pelvis and ureter that resolved with PCN tube placement.                                                                                                                | NSAIDS             | 0              | No | Full recovery    |
| 30 | Obstruction         | 75 yo WF with ovarian cancer whose creatinine rose from 0.85 to 1.78mg/dL (stage 2 AKI) seven months after starting durvalumab due to bilateral urinary obstruction from cancer progression that resolved with PCN tube placement.                                                                                                          | None               | 0              | No | Full recovery    |
| 31 | Obstruction         | 55 yo WM with DLBCL whose creatinine rose from 0.62 to 6.45mg/dL (stage 3 AKI) five months after starting atezolizumab due to bilateral urinary obstruction from extrinsic compression due to bulky abdominal lymphadenopathy that resolved with PCN tube placement.                                                                        | NSAIDS             | 0              | No | Full recovery    |
| 32 | Obstruction         | 60 yo WM with bladder cancer whose creatinine rose from 1.20 to 3.33mg/dL (stage 2 AKI) five months after starting atezolizumab due to disease progression, cancerous obstruction requiring PCN tubes placed.                                                                                                                               | None               | 0              | No | Partial recovery |
| 33 | Obstruction         | 75 yo WM with prostate cancer whose creatinine rose from 1.44mg/dL to 4.6mg/dL (stage 3 AKI) four months after starting atezolizumab due to disease progression, bladder outlet obstruction, and ultimately led to hospice enrollment and death.                                                                                            | PPI                | 0              | No | Terminal decline |
| 34 | NOS                 | 60 yo WF with NSCLC whose creatinine rose from 0.71 to 1.16mg/dL (stage 1 AKI) eight months after starting durvalumab without diagnostic workup, recovered without intervention.                                                                                                                                                            | None               | 0              | No | Full recovery    |
| 35 | NOS                 | 60 yo WF with cholangiocarcinoma whose creatinine rose from 0.61 to 1.57mg/dL (AKI stage 2) ten months after starting atezolizumab, had slowly progressively rise in creatinine in the context of recurrent E.coli UTI (also had a history of recurrent UTI prior to ICI treatment as well), remained on atezolizumab, no concurrent irAEs. | PPI, ciprofloxacin | 0              | No | Partial Recovery |
| 36 | NOS                 | 60 yo WF with ovarian cancer whose creatinine rose from 0.70 to 2.01mg/dL (stage 2 AKI) five months after starting avelumab and talazoparib, patient was volume repleted with only partial improvement. Avelumab was stopped due to disease progression. Kidney function slowly recovered.                                                  | PPI, NSAIDS        | 0              | No | Partial recovery |

Legend: Outcomes of AKI were defined by serum creatinine levels: 1) full recovery (if the creatinine recovered to  $\leq 0.3$ mg/dL of baseline), 2) partial recovery (improvement from peak, but not within 0.3mg/dL of prior baseline), and 3) no recovery (if serum creatinine worsened) or 4) terminal decline if the patient died during the hospitalization for AKI. To protect confidentiality, the ages of patients have been rounded to the nearest 5-year landmarks. Concurrent medications include those administered at the time of AKI. Abbreviations: WM = white male, WF = white female, BM = Black male, AM = Asian male, yo = years old, Cr = serum creatinine, ICPI = immune checkpoint inhibitor, NOS = not otherwise specified, AIN = acute interstitial nephritis, ATN = acute tubular necrosis, irAE = immune related adverse event, PPI = proton pump inhibitor, NSAIDS = non-steroidal anti-inflammatory drugs, UTI = urinary tract infection, PCN = percutaneous nephrostomy tube, RCC = Renal cell cancer, NSCLC = Non-small cell lung cancer, DLBCL = Diffuse Large B-cell Lymphoma
